# Supplementary material for: Generating rate equations for complex enzyme systems by a computer-assisted systematic method
Source: Springer Nature journal article supplement (doi:10.1186/1471-2105-10-238), 2009-08-04

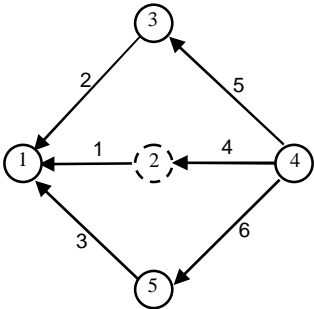

Supplement: 12859_2009_2968_MOESM4_ESM.pdf [file 12859_2009_2968_MOESM4_ESM.pdf]
