# Supplementary material for: Generating rate equations for complex enzyme systems by a computer-assisted systematic method
Source: Springer Nature journal article supplement (doi:10.1186/1471-2105-10-238), 2009-08-04
Supplement: 12859_2009_2968_MOESM5_ESM.pdf [file 12859_2009_2968_MOESM5_ESM.pdf]

LinkMatrix

|   |   |   |   |   |
|---|---|---|---|---|
| 0 | 1 | 2 | 0 | 3 |
| 1 | 0 | 0 | 4 | 0 |
| 2 | 0 | 0 | 5 | 0 |
| 0 | 4 | 5 | 0 | 6 |
| 3 | 0 | 0 | 6 | 0 |

KineticMatrix

|       |               |               |               |               |
|-------|---------------|---------------|---------------|---------------|
| 0     | $k_6 \cdot P$ | $k_1 \cdot A$ | 0             | $k_5$         |
| $k_6$ | 0             | 0             | 0             | $k_2 \cdot B$ |
| $k_1$ | 0             | 0             | 0             | 0             |
| 0     | $k_5 \cdot C$ | $k_2$         | 0             | 0             |
| $k_3$ | 0             | 0             | $k_4 \cdot A$ | 0             |

The input file

Opened file is input5.txt

- 1 3 k1\*A
- 3 1 k\_1
- 1 2 k\_6\*P
- 2 1 k6
- 1 5 k3\*B
- 5 1 k\_3
- 2 4 k\_5
- 4 2 k5\*C
- 3 4 k2\*B
- 4 3 k\_2
- 4 5 k\_4
- 5 4 k4\*A

Expression.m

```
function [E F D] = Expression(K,Con)
```

```
%%
% user supplies the input con
A = Con(1);
B = Con(2);
C = Con(3);
P = Con(4);

%%
% user supplies the input par
```

The Patterns List : 12

- 1-2-3-4
- 1-2-3-5

**Patterns Viewer**

The Patterns List

- 1-2-3-4
- 1-2-3-5
- 1-2-3-6
- 1-2-4-6
- 1-2-5-6
- 1-3-4-5
- 1-3-5-6
- 1-4-5-6
- 2-3-4-5
- 2-3-4-6

Original System

Selected Pattern
